1 **Scale-specific analysis of fMRI data on the irregular cortical surface**

2

3 Yi Chen<sup>1,2</sup>, Radoslaw Martin Cichy<sup>1,3</sup>, Wilhelm Stannat<sup>4</sup>, John-Dylan Haynes<sup>1</sup>

4

5 <sup>1</sup> Bernstein Center for Computational Neuroscience, Berlin Center of Advanced  
6 Neuroimaging & Clinic of Neurology, Charité–Universitätsmedizin Berlin, corporate  
7 member of Humboldt-Universität zu Berlin, Freie Universität Berlin, and Berlin Institute  
8 of Health, Berlin, Germany

9 <sup>2</sup> Institute of Cognitive Neurology and Dementia Research, University Hospital  
10 Magdeburg, Magdeburg, Germany

11 <sup>3</sup> Department of Education and Psychology, Free University Berlin, Berlin, Germany

12 <sup>4</sup> Institute for Mathematics, Technical University Berlin, Berlin, Germany

13

14 ***Abstract***

15 To fully characterize the activity patterns on the cerebral cortex as measured with fMRI,  
16 the spatial scale of the patterns must be ascertained. Here we address this problem by  
17 constructing steerable bandpass filters on the discrete, irregular cortical mesh, using an  
18 improved Gaussian smoothing in combination with differential operators of directional  
19 derivatives. We demonstrate the utility of the algorithm in two ways. First, using  
20 modelling we show that our algorithm yields superior results in numerical precision and  
21 spatial uniformity of filter kernels compared to the most widely adopted approach for  
22 cortical smoothing. An important interim insight hereby was that the effective scales of  
23 information differ from the nominal filter sizes applied to extract them, and thus need to  
24 be calculated separately to compare different algorithms on par. Second, we applied the  
25 algorithm to an fMRI dataset to assess the scale and pattern form of cortical encoding of  
26 information about visual objects in the ventral visual pathway. We found that filtering by  
27 our method improved the detection of discriminant information about experimental  
28 conditions over previous methods, that the level of categorization (subordinate versus  
29 superordinate) of objects was differentially related to the spatial scale of fMRI patterns,  
30 and that the spatial scale at which information was encoded increased along the ventral  
31 visual pathway. In sum, our results indicate that the proposed algorithm is particularly  
32 suited to assess and detect scale-specific information encoding in cortex, and promises  
33 further insight into the topography of cortical encoding in the human brain.

34

## 35 ***Introduction***

36 A major goal of human cognitive neuroimaging is to establish a mapping between mental  
37 representations and patterns of activity human cortex (van Essen et al. 2001; Logothetis  
38 & Wandell, 2004). The main description of this correspondence is functional localization,  
39 i.e. where on the two-dimensional cortical sheet neural representations reside (van Essen  
40 et al., 1998; Fischl et al. 1999; Brett et al., 2002). Neural representation in human cortex  
41 typically involves distributed neuronal populations. Thus, representations in  
42 neuroimaging are rarely restricted to single image points, but rather appear as patches of  
43 activation across the cortical sheet. Therefore, two further parameters of neural  
44 representations on the cortical beyond point location must be given: the spatial *scale* and  
45 the *form* of the pattern in the localized patch. Without information about spatial scale it  
46 remains impossible to correctly ascribe cognitive function to any of the multiple scales on  
47 which the brain is organized, ranging from single cells over cortical columns, patches and  
48 large-scale maps (Op de Beeck, 2008; Swisher et al., 2010; Brants et al., 2011; Misaki et  
49 al., 2013). Without a detailed characterization of the activation pattern, e.g. through the  
50 direction of a gradient, valuable and distinctive fine-grained information might be  
51 neglected (Portilla & Simoncelli, 2000).

52 The methodological challenge in characterizing the spatial patterns of human  
53 brain activity is that analysis must observe the structure restriction of a highly convoluted  
54 cortical sheet, and be carried out with respect to the underlying differential geometry of  
55 the irregular two-dimensional cortical sheet (van Essen et al. 2007; Chen et al. 2011),  
56 rather than three-dimensional Euclidean space (Brants et al., 2011). For this, two key  
57 technical challenges need to be addressed: 1) how to assess spatial scale on an irregular  
58 mesh that captures the geometry of the cortical sheet (Hagler et al., 2006) correctly, and  
59 2) how to assess the directional components in the activation pattern (Simoncelli &  
60 Freeman, 1995).

61 Here, we address both issues simultaneously with an algorithmic scheme for  
62 directional spatial filtering on the cortical sheet. We built steerable bandpass filters on the  
63 irregular cortical surface, constructing differential operators of directional derivatives,  
64 and combining them with Gaussian smoothing kernels. To achieve an infinite-impulse  
65 response filter (IIRF) for Gaussian smoothing, we adopted a geometrical discretization of  
66 the Laplace-Beltrami operator (Meyer et al., 2003), combined with a modified algorithm  
67 for computing the symmetric matrix exponential (Sidje, 1998). Importantly, we note that  
68 the effective scales of information differ from the nominal filter sizes applied to extract it,  
69 due to the underlying smoothness of the data. Thus, filtering approaches must take this  
70 into account, and only the effective scales of information can be compared across  
71 different approaches.

72 We demonstrate the utility of the algorithm in comparison to previously proposed  
73 methods in two ways. First, using modelling we show that through improvement in the  
74 smoothing operations our proposed method yields superior results in numerical precision  
75 and spatial uniformity of filter kernels compared to the most widely adopted approach for  
76 cortical smoothing. Second, we apply the proposed method to an fMRI dataset to assess  
77 the cortical encoding of information about visual objects at the subordinate (exemplar)  
78 and superordinate (category) level and made several observations. We found that filtering

79 by our method improved the detection of discriminant information about experimental  
80 conditions. Further, it provided a novel quantitative description of the spatial organization  
81 of encoding of visual categories: Information about ordinate level visual categories (e.g.  
82 distinguishing plane from car) was more prominent at a coarser scale than for subordinate  
83 categories (or exemplars, i.e. distinguishing one plane from another), and we observed a  
84 systematic increase in the spatial scale at which information was maximally explicit  
85 along the hierarchy of the ventral visual stream.

86 Together, this indicates that the proposed implementation to be particularly suited  
87 to assess and detect scale specific information encoding on the cortical surface, promising  
88 further insight into the topography of cortical encoding in the human brain.

## 89 **1 Methods**

### 90 **1.1 Heat diffusion and Gaussian smoothing**

91 Assessment of scale specific information relies crucially on the spatial smoothing  
92 operator and its implementation on the cortical surface. The smoothing operator must  
93 observe the geometry of the irregular mesh, and avoid introducing geometric distortions  
94 and inhomogeneity to allow for appropriate and unbiased assessment. Towards this aim  
95 we employed a Gaussian smoothing operator based on heat diffusion on irregular mesh.

#### 96 **1.1.1 The relation of Gaussian smoothing to the heat diffusion equation**

97 The Gaussian smoothing operation in space is mathematically equivalent to a temporal  
98 physical process of heat diffusion with the input signal as initial condition (Koenderink,  
99 1984). The following partial differential equation characterizes this physical process:

$$100 \quad \frac{\partial f(t,x)}{\partial t} = -\Delta f(t,x), \quad (1)$$

101 where  $\Delta$  is the spatial Laplacian, or Laplace-Beltrami operator in case the diffusion  
102 process is on a differentiable manifold. The general solution to this equation, with initial  
103 condition  $f(0,x)$ , can be given by:

$$104 \quad f(t,x) = e^{-t\Delta} f(0,x), \quad t > 0, \quad (2)$$

105 where  $e^{-t\Delta}$ , the diffusion operator, is the exponential of differential operator  $-t\Delta$ . From  
106 the viewpoint of spatial smoothing filter, it is convenient to write above solution as:

$$107 \quad f_t(x) = (G_t * f_0)(x), \quad t > 0, \quad (3)$$

108 where  $f(t,\cdot) = f_t$  and  $G_t = e^{-t\Delta}\delta(x)$ , the application of  $e^{-t\Delta}$  to a Dirac delta function.  
109 The impulse function  $G_t$  is also called the heat kernel, and the time variable  $t$  acts as the  
110 size or scale parameter of Gaussian smoothing kernel  $\exp(-x^2/t)$ .

111 **1.1.2 Discretization of geometrical Laplace-Beltrami operator on triangulated**  
 112 **mesh**

113 When applied to a discrete surface mesh, the Laplace-Beltrami operator  $\Delta$  needs to be  
 114 discretized and expressed in matrix form. One of the most commonly adopted  
 115 discretization of this differential operator is the so-called geometrical Laplacian: it takes  
 116 the embedding geometry of the mesh into account and is given by (Meyer et al., 2003;  
 117 Reuter, 2009; see Fig. 1A for a visualization of the parameters in the equations):

$$\begin{aligned}
 & \begin{cases} Q_{i,j} = -[\cot(\beta_{i,j}) + \cot(\beta'_{i,j})]/2 \\ Q_{i,i} = -\sum_{j \in \partial i} Q_{i,j} \end{cases} \\
 & B_{i,j} = \begin{cases} \sum_{j \in \partial i} [\text{area}(t_{i,j}) + \text{area}(t'_{i,j})]/6, & \text{if } i = j \\ 0 \end{cases} \\
 & \Delta = B^{-1} \cdot Q \tag{4}
 \end{aligned}$$

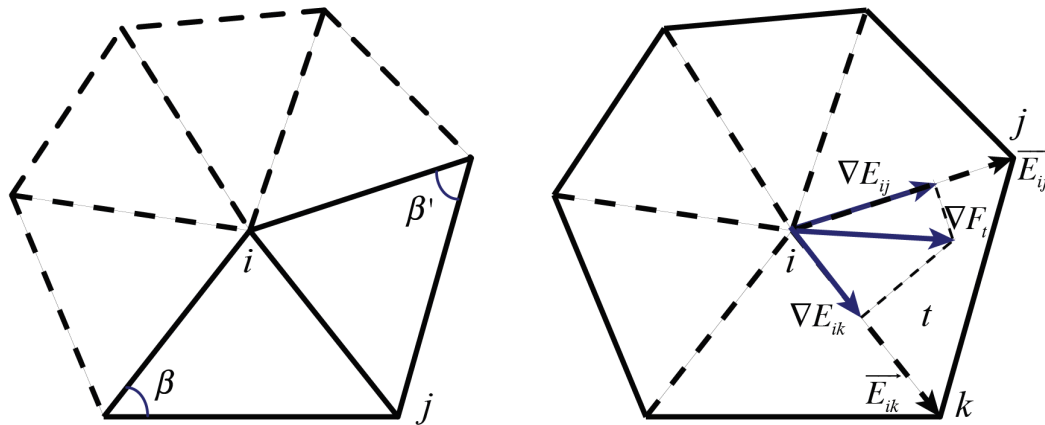

121 **Figure 1:** Geometric Laplacian and directional gradient on surface mesh. (A): the parameters  
 122 of the discrete Laplacian-Beltrami operator on a triangulated mesh for the  $i$ -th vertex, as in  
 123 (4). (B): parameters for estimation of gradients for defining directional derivative operators  
 124 as in (9).  
 125  
 126  
 127

128 where  $\beta$  and  $\beta'$  are the angles subtended by each edge,  $t$  and  $t'$  the triangles at the two  
 129 sides of each edge, and  $\partial_i$  indicates the immediate neighbors of vertex  $i$ . In practice, the  
 130 Laplacian is implemented as a sparse matrix in which non-zero items correspond to edges  
 131 in the mesh and are given as in Fig. 1A. Intuitively, each row of the symmetric matrix  $Q$   
 132 quantifies the conductivity relations between a vertex and its immediate neighboring  
 133 vertices, whereas the diagonal matrix  $B$ , also called *lumped mass* matrix, specifies for  
 134 each vertex a capacity factor, an integral measure for the vertex, so that the inner product  
 135 of two functions on the underlying surface  $\langle f_x, f_y \rangle = \int_M f_x \cdot f_y ds$  can be numerically  
 136 computed by  $\langle x, y \rangle = x^T B y$ .

### 137 **1.1.3 Calculating numerical solutions to the diffusion equation**

138 For a given input function  $f_0$  and a scale parameter  $t$ , we can substitute (4) into (2) and  
139 use a matrix exponential algorithm to compute the numerical solution  $f_t$  by:

$$140 \quad f_t = \text{ExpMV}(-tB^{-1}Q, f_0), \quad t > 0. \quad (5)$$

141 where  $\text{ExpMV}(A, v)$  approximates  $\exp(A) \cdot v$  without computing  $\exp(A)$  explicitly  
142 (Sidje, 1998). See **Supplementary Text** for more detail about this algorithm and an  
143 efficient implementation for diagonal  $B$  and symmetric  $Q$ .

### 144 **1.1.4 Laplacian of Gaussian as bandpass filters**

145 As from (3), the solution  $f_t$  approximates the smoothing of input  $f_0$  by a Gaussian kernel  
146 of size  $t$ . Applying the Laplacian  $B^{-1}Q$  to  $f_t$ , we can immediately get the bandpass  
147 filtered detail of  $f_0$  at scale of parameter  $t$ , with respect to the symmetric, second  
148 derivative of Gaussian:

$$149 \quad d_t = -B^{-1}Q \cdot f_t. \quad (6)$$

150 We note (6) is the ubiquitous feature detector in computer vision algorithms (Marr and  
151 Hildreth, 1980), Laplacian of Gaussian (LoG), in form of a discrete differential operator  
152 on discrete surface. Notice the equivalence of the right sides of (6) and (1): From the  
153 perspective of scale space representation, LoG simply acts as the partial derivative of a  
154 multiscale function with respect to its scale parameter.

## 155 **1.2 Steerable filters of directional derivatives of Gaussian**

### 156 **1.2.1 Local directions are necessary for defining directional derivative operators**

157 To construct steerable bandpass filters at specific scales, we first note the differential  
158 property of convolution:

$$159 \quad \frac{\partial G}{\partial x} * f = \frac{\partial}{\partial x} (G * f). \quad (7)$$

160 Therefore, if we have already computed  $f_t$  by applying a Gaussian kernel  $G_t$  to an input  
161 function  $f_0$ , we can simply apply a differential operator to  $f_t$  to get the scale-specific  
162 details of  $f_0$ , equivalent to the outputs from bandpass filters of Gaussian derivatives.  
163 Particularly, as we are concerned with functions defined on a 2D manifold, we would like  
164 to have differential operators for partial derivatives in orthogonal directions on the  
165 surface, so that the linear combinations of them could be “steered” to any possible  
166 direction in the tangent bundle of the surface. This property of orthogonal directional  
167 derivatives is called steerability (Freeman and Adelson, 1991; Simoncelli & Freeman,  
168 1995)

169 To construct such differential operators for directional derivatives, we need to define a  
170 system of directions at every vertex on the surface mesh. These directions should be  
171 uniformly consistent: The directions over neighboring vertices being parallel to each  
172 other. Geometrically, this is equivalent to planar parameterization of the surface, and is  
173 only possible for surfaces with zero Gaussian curvature everywhere. For our application,

174 however, it may suffice to define such directions that are parallel to each other over flat  
 175 area and change smoothly and consistently over a curved area.

### 176 1.2.2 Gradients of Fiedler vector field as local directions

177 We choose to define these directions by using the discrete gradients of the Fiedler vector  
 178  $F_\Delta$  (Biyikoglu et al. 2007), defined as the generalized eigenvector corresponding to the  
 179 2nd smallest eigenvalue  $\lambda$  of the discrete Laplace-Beltrami operator  $\Delta$ :

$$180 \quad F_\Delta \triangleq Q \cdot F_\Delta = \lambda B \cdot F_\Delta . \quad (8)$$

181 When the underlying surface is sufficiently smooth, the Fiedler vector is the smoothest  
 182 bi-modal function defined on the vertices and its gradient field  $\nabla F_\Delta$  is consistent almost  
 183 everywhere (except at very few modal and saddle vertices).

### 184 1.2.3 Approximation of Fiedler vector gradients on mesh and directional 185 derivative operators

186 To calculate the gradient of Fiedler vector  $F$  at the vertices on a triangulated mesh, we  
 187 assume piece-wise linearity of the underlying Fiedler function on the triangle faces so  
 188 that the gradient on a triangle is constant and can be computed by linear fitting:

$$189 \quad \nabla F_t = [\overrightarrow{E}_{ij}; \overrightarrow{E}_{ik}]^- \cdot [\nabla E_{ij} \ \nabla E_{ik}]^T, \quad (9)$$

190 where  $i, j, k$  are the vertices of the triangle face  $t$ ,  $\overrightarrow{E}_{ij}$  and  $\overrightarrow{E}_{ik}$  are the normalized edge  
 191 vectors,  $\nabla E_{ij}$ ,  $\nabla E_{ik}$  the gradients of  $F$  along the two edges and  $[\ ]^-$  the pseudo inversion  
 192 of matrix (See **Fig. 1B** for the parameters in the equation).

193 Note that the above procedure for calculating the gradient of  $F$  is applicable to any  
 194 smooth function  $f$  defined on the surface, thus on each triangle face, the partial  
 195 derivatives of a given function  $f$  along the direction of the gradient of Fiedler vector can  
 196 be calculated via the inner product of the two gradients:

$$197 \quad \frac{\partial f}{\partial F_t} = \langle \nabla f_t, \nabla F_t \rangle / \|\nabla F_t\| \quad (10)$$

198 The directional derivative of  $f$  at vertex  $i$  is then estimated by the area-weighted average  
 199 of the partial derivatives on all the triangles containing vertex  $i$ :

$$200 \quad \frac{\partial f}{\partial F_i} = \sum_{t \in \partial i} area(t) \cdot \frac{\partial f}{\partial F_t} / \sum_{t \in \partial i} area(t). \quad (11)$$

201 Furthermore, by defining the orthogonal direction of the Fiedler gradients as the cross  
 202 products of them and the face normal vectors:

$$203 \quad \mathbf{V}_t = \nabla F_t \times \mathbf{N}_t, \quad (12)$$

204 where  $\mathbf{N}_t$  is the normal vector of the triangle face, we can compute the directional  
 205 derivatives on this orthogonal direction in the same way as on the direction of Fiedler  
 206 gradients. It is important to note that these two orthogonal directions (hereafter referred

207 as primary and secondary directions) thus allow us to construct directional derivative  
208 operator for each vertex, on any local direction in the plane tangent to the vertex, by  
209 simply taking a proper linear combination of them.

210 Fig. 2A shows the Fiedler vector on a cortical surface mesh with a zoomed-in portion  
211 showing the locally defined primary directions. In Fig. 2B, filters of directional  
212 derivatives of Gaussian are visualized with their impulse response functions.

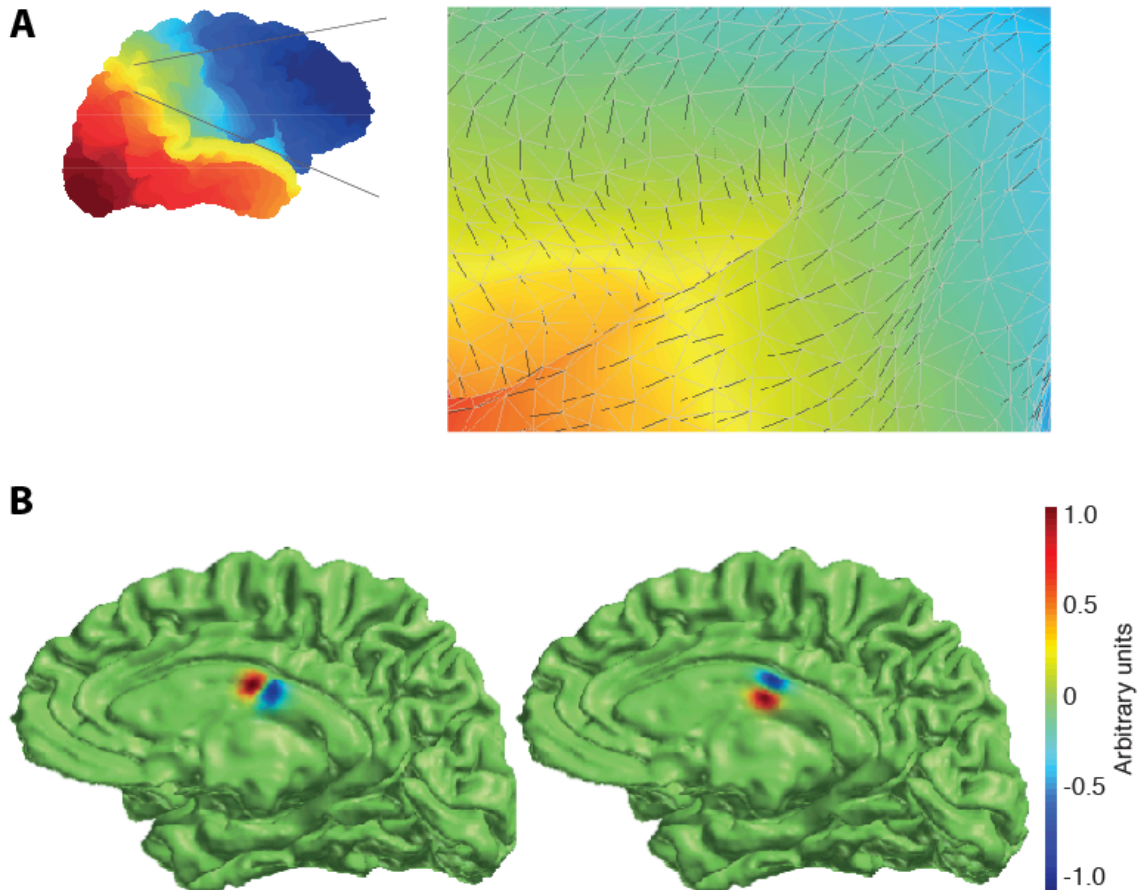

213  
214  
215 **Figure 2.** Directional derivatives of Gaussian based on directions defined by Fiedler vector. (A)  
216 Visualization of Fiedler vector of the discrete Laplacian-Beltrami operator on a patch of cortex  
217 (indicated by black arrows). Colors indicate position in space along the posterior-anterior  
218 direction. (B) Impulse responses of the filters based on directional derivatives of Gaussian,  
219 normalized to unit numerical range (left: primary direction; right: secondary direction). Colors in  
220 arbitrary units indicate filter weights.

### 221 1.3 Effective filter size and effective scale

#### 222 1.3.1 Effective filter size is estimated from the smoothness of its action on Gaussian 223 random field

224 In order to build a pyramidal representation with linearly growing spatial scale, we need  
225 to determine the scale parameters  $t$  of the heat diffusion kernel to relate its value to  
226 smoothing filter size. Here we followed the practice in Hagler et al. (2006) by estimating

227 the overall smoothness of filtered Gaussian random noises as the equivalent full-width-at-  
228 half-magnitude (FWHM) size of these filters. Specifically, we generated independent,  
229 uniformly distributed random noise on the surface, applied the filters to it and estimated  
230 the smoothness according to random field theory (RFT):

$$231 \quad FWHM_t = dv \sqrt{\frac{-2 \ln 2}{\ln \left(1 - \frac{\text{var}(ds)}{2 \text{var}(s)}\right)}}, \quad (13)$$

232 where  $dv$  is the average edge length,  $\text{var}(ds)$  the variance of difference between  
233 neighboring vertices, and  $\text{var}(s)$  the total variance over all the vertices. Note the FWHM  
234 for Gaussian smoothing kernel  $\exp(-x^2/t)$ , is proportional to the square root of the  
235 scale parameter  $t$ . Therefore, we calculated the FWHM for each cortical surface mesh on  
236 a range of parameters  $t$ , and took the linear fitting of it and  $\sqrt{t}$  to extrapolate for other  
237 filter size regarding parameter  $t$ . The FWHM calculated in this way is taken as the  
238 *effective filter size*.

### 239 **1.3.2 Effective scale is estimated from the smoothness of residual data**

240 While the effective filter size can be a valid estimation of spatial scale for functions that  
241 are smoothed from independent Gaussian random noise, the surface images mapped from  
242 volume data may often violate the independence assumption. To estimate the *effective*  
243 *scales* of the results, we opted to adopt a *post hoc* estimation, by calculating the ratio  
244 between the cortical surface area and the number of resels computed by SurfStat from the  
245 *residuals*:

$$246 \quad FWHM_t = \sqrt{\frac{\text{area}(S)}{\text{num}(\text{resels})}}. \quad (14)$$

247 Note the resels returned from SurfStat are multi-dimensional and only that of 2D, or areal  
248 resel number, is used in (14).

## 249 **1.4 Evaluation of Gaussian smoothing algorithms**

250 In order to evaluate the numerical precision and spatial uniformity of the proposed heat  
251 diffusion smoothing algorithm, we applied it to impulse functions on a sphere mesh, on  
252 which Gaussian kernels can be calculated analytically and then sampled for reference. We  
253 created sphere meshes by iteratively subdividing a regular tetrahedron and projecting new  
254 vertices to the sphere. In doing so, we constructed a topologically almost-everywhere  
255 regular mesh: All except the initial 4 vertices have the same connectivity of 6. On the  
256 other hand, geometric irregularity of variable areal measures is introduced by the  
257 spherical projection. An elastic regularization was applied in each of the iteration to  
258 control this areal variability. We repeated this iterative procedure for 7 times to generate a  
259 sphere mesh of about 32,000 vertices (radius: 10 mm, average edge length: 0.1385 mm).  
260 Impulse functions at random locations on the sphere are then generated and filtered by  
261 different smoothing algorithms for comparison.



## 262 **1.5 fMRI experiment and data preprocessing**

263 To demonstrate the approach used here we re-analysed data from an fMRI experiment on  
264 categorical-level and exemplar-level representation of visual objects (published  
265 previously in Cichy et al., 2011). We only give a briefly summary here. 13 healthy  
266 subjects (1 subject's data were not included in this analysis due to poor T1/EPI volume  
267 alignment) participated in a mini-block (duration: 6s) design. Stimuli were 3 different  
268 exemplars from 4 different categories (animal, chair, car and airplane), yielding a total of  
269 12 different images. In each mini-block, a single object was rendered in 3D (6 renderings  
270 presented for 800 ms with 200 ms gap) at a position either 4° right or left of the screen  
271 center, subtending ~4.6° of visual angle. Each rendering either repeated the previous  
272 viewpoint, or displayed with a random viewpoint at least 30° difference in rotation in  
273 depth compared to the previous rendering. The number of repetitions of viewpoints was  
274 counterbalanced across objects. Subjects were instructed to fixate at the center of the  
275 screen and perform a one-back viewpoint judgment task.

276 Functional images were acquired with a gradient-echo EPI sequence (TR = 2000  
277 ms, TE = 30 ms, flip angle = 70°, FOV = 256 mm, matrix = 128 × 96, interleaved  
278 acquisition, no gap, 2mm isotropic voxels, 24 slices). Slices were positioned along the  
279 slope of the temporal lobe to cover the ventral visual cortex. Each run of the main  
280 experiment has 412 volumes; in total 5 experiment runs were collected for each subject.  
281 In addition, a whole brain EPI volume was also acquired in a separate run to facilitate the  
282 T1/EPI alignment. All functional volumes were motion corrected using SPM8, and  
283 aligned to the whole brain EPI volume, which was coregistered to the structural volume.  
284 Realignment parameters were later used in hemodynamic modeling to eliminate motion-  
285 induced artifacts.

## 286 **1.6 Cortical surface mesh generation and volume-surface data** 287 **mapping**

288 Cortical surface meshes were generated for each subject from high-resolution structural  
289 MRI scans (192 sagittal slices, TR = 1900 ms, TE = 2.52 ms, flip angle = 9°, FOV = 256  
290 mm, 1 mm isotropic voxels) with FreeSurfer version 5.1 (Dale et al., 1999; Fischl et al.,  
291 1999). A gray-mid layer lying half the distance between white matter surface and pial  
292 surface was created for volume-surface data mapping, as it has optimal uniformity of  
293 surface curvature and offers good balance between spatial specificity and sensitivity of  
294 information extraction (Chen et al. 2011). To avoid oversampling in data mapping, we  
295 further simplified the generated mesh using CGAL library ([www.cgal.org](http://www.cgal.org)), to make sure  
296 that all the length of the mesh edges are between 1 and 2mm. This simplification also  
297 reduced the number of vertices up to 50% and speeded subsequent analyses remarkably.  
298 The raw volume data were then tri-linearly sampled with the vertex coordinates to  
299 complete the volume-surface mapping, so for each volume we had a discrete function  
300 defined on the vertices, which is called *surface image* hereafter.

## 301 **1.7 Multivariate statistical analysis of discriminant information**

### 302 **1.7.1 Temporal and spatial filtering on surface images**

303 For each vertex, the values from all the surface images constitute a time series. We first  
304 applied temporal highpass filtering and pre-whitening to these time series, vertex-by-  
305 vertex, using SPM8. Heat diffusion smoothing was then applied to the surface images,  
306 time point by time point, with pre-computed scale parameters. At each scale and to each  
307 smoothed surface image, differential operators of directional derivatives and symmetric  
308 Laplacian were applied to extract the scale-specific details. This procedure made  
309 available for us both the pyramidal representation and the scale-specific details. Note that  
310 while the outputs from smoothing and symmetric Laplacian of Gaussian filtering are  
311 univariate, the outputs from the directional derivative filtering are bivariate.

### 312 **1.7.2 GLM estimation**

313 Next, we modeled the cortical response to the 24 experimental conditions (12 objects  
314 presented either in the left or the right hemifield). To estimate the overall smoothness of  
315 residuals, all the five runs in the experiment were modeled together for each subject. The  
316 onsets of the mini-blocks were entered into the general linear model (GLM) as regressors  
317 of interest and convolved with a canonical hemodynamic response function (HRF). All  
318 these regressors of interest, together with that of the motion parameters and default  
319 baseline, were also preprocessed with temporal highpass filtering and pre-whitening. We  
320 then fitted the preprocessed GLM to the spatially filtered data, at each scale and vertex by  
321 vertex, to estimate the model parameters and residuals, which were later used for  
322 calculating the effective scales.

### 323 **1.7.3 Using SurfStat for multivariate analysis and smoothness estimation**

324 To investigate the scale-specific information that differentiates the categories of objects,  
325 particularly for the bivariate details extracted by the directional derivative filters, we used  
326 the SurfStat toolbox (Worseley et al., 2009) to compute the  $F$ -statistics on two categorical  
327 levels: On the subordinate level, the null hypothesis assumes that all the 3 exemplar  
328 objects within the same category have the same mean over runs; at the ordinate level, the  
329 null hypothesis assumes that all the 4 categories have the same mean, where the 3 objects  
330 within each category were treated as repeated observations. In both cases, we treat the  
331 presentations in different hemifields as repeated observations of the same object. Note for  
332 multivariate parameters, SurfStat computes the Roy's greatest root as the  $F$ -statistic,  
333 which is the largest  $F$ -value over all possible linear combinations of the input variables.  
334 The statistical significance of the results and the respective significance thresholds  
335 regarding surface-based multiple comparison correction, is also derived by the routines in  
336 SurfStat.

## 337 2 Results

### 338 2.1 Comparison of smoothing quality by heat diffusion smoothing 339 versus smoothing through iterative averaging

340 To evaluate the quality of the heat diffusion smoothing operator, we applied it in a model  
341 case for which analytic solutions are readily available, and compared the results to the  
342 smoothing operator based on iterative averaging, i.e. the current standard procedure as  
343 implemented in Freesurfer.

344 In detail, we generated 100 impulse functions at random locations on a sphere mesh. For  
345 each location, a Gaussian kernel with unit sigma was calculated and sampled to the  
346 vertices as a *discretized Gaussian* for reference. We then applied the heat diffusion and  
347 the iterative averaging algorithms to the impulse functions and calculated the mean  
348 squared errors (MSE) with respect to the discretized Gaussians. Note that for comparison  
349 across smoothing approaches, the smoothing parameters, i.e. the effective filter sizes,  
350 have to be the same, which were determined with RFT-based estimation of smoothness  
351 before the comparison.

352 We made two observations. First, we found that the MSE between heat diffusion  
353 smoothing and the reference discretized Gaussian in both absolute and relative terms was  
354 ~30 times smaller than iterative averaging (Table 1A). Fig. 3 displays representative  
355 results of iterative and heat diffusion smoothing, demonstrating this point visually.  
356 Second, we observed that for heat diffusion smoothing the variance of filter sizes was  
357 comparable to the reference discretized Gaussian, while it was ~10 times larger for  
358 iterative averaging (Table 1B). In Figure 3, this is expressed visually by the fact that the  
359 smoothing results from heat diffusion converge not only more geometrically to the  
360 discretized Gaussians, but also more uniformly over regions of different triangulation  
361 density. In contrast, the iterative averaging introduced remarkable geometric distortion  
362 and inhomogeneity.

363 Together, our results show that heat diffusion smoothing provides higher numerical  
364 precision and geometric uniformity than iterative averaging. Thus, for further filtering  
365 analyses on the cortical surface we used only heat diffusion smoothing.

366

|                          | (A)        |            | (B)         |              |
|--------------------------|------------|------------|-------------|--------------|
|                          | Abs. Error | Rel. Error | Filter Size | Var. of Size |
| Sampled Gaussian         |            |            | 2.1089      | 0.0357       |
| Heat Diffusion Smoothing | 0.0003     | 0.0054     | 2.0980      | 0.0411       |
| Iterative Averaging      | 0.0109     | 0.1816     | 2.1321      | 0.3257       |

367 **Table 1:** Approximating precision of smoothing algorithms with respect to (A) error and (B) filter  
368 size. Filter parameters were first determined by matching the RFT smoothness to the FWHM of  
369 sampled Gaussian. Mean squared errors are averages over 100 smoothing results regarding the  
370 respective sampled Gaussian. Filter sizes were then empirically estimated by the square root of the  
371 area of vertices with value greater than half of the maximum, the variance of size is calculated over  
372 100 instances.  
373

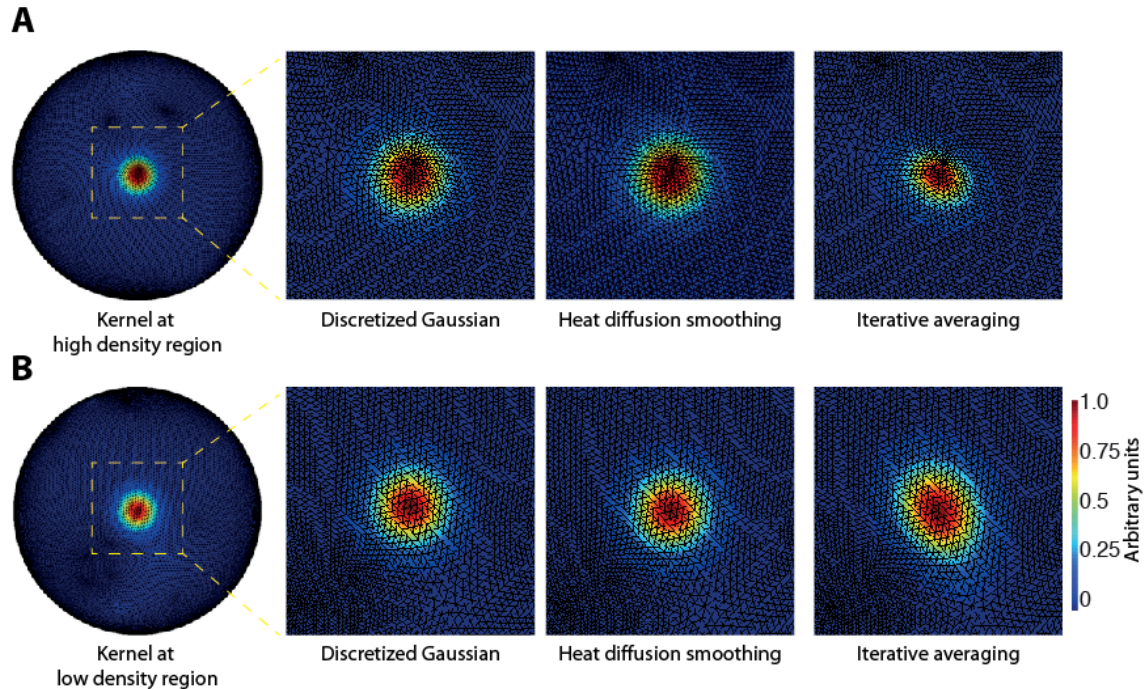

374  
375  
376  
377  
378  
379

**Figure 3:** Gaussian smoothing on a sphere mesh at regions with different triangulation density. Left: Discretized Gaussian; Middle: Heat diffusion smoothing; Right: Iterative averaging. Results from an input of impulse function located at regions of high (A) and low (B) density of triangulation. Compared to heat diffusion smoothing, iterative averaging introduces density-dependent size inhomogeneity and geometric deviation from discretized Gaussian.

## 380 **2.2 Comparison of different filtering operations on the cortical surface** 381 **in revealing discriminative information**

382 To assess the spatial scale at which information is encoded on the cortical sheet,  
383 activation patterns must be filtered at different spatial scales. Here, we evaluated three  
384 types of smoothing filters. First, we used Gaussian smoothing (SM) in the heat diffusion  
385 implementation at different scales, resulting in low-pass filtered activation patterns.  
386 Second, to isolate a specific spatial scale beyond simple low-pass filtering, we used  
387 Laplacian of Gaussians (LoG) as a band-pass filter. The result of LoG filtering are band-  
388 passed activation patterns. Third, to also take into account that spatial patterns on the  
389 cortical surface have gradients and orientations, we used directional derivatives of  
390 Gaussians (dDG). The result of dDG filtering are band-passed and direction-specific  
391 activation patterns.

### 392 **2.2.1 Matching effective filter size is a crucial precondition for comparing results** 393 **of filtering approaches on the cortical surface**

394 A precondition for a proper comparison of the results of the proposed filtering methods is  
395 that results are compared when the same filter sizes are compared. However, as the  
396 effective size is estimated by the pattern smoothness with RFT-theory (see 1.3), *effective*  
397 filter sizes might differ from *nominal* filter sizes when the elements of the smoothed  
398 patterns are spatially correlated. More specifically, spatially correlated patterns would

399 decrease the variance of neighbouring difference  $ds$  in (13), thus increase the overall  
400 estimation. As fMRI voxels that make up activation patterns do show strong dependence,  
401 it cannot be assumed that effective and nominal filter sizes are identical. To determine the  
402 relation between the diffusion parameter and the resultant effective filter size on cortical  
403 surfaces, we generated 100 normally distributed random functions on each surface, and  
404 applied heat diffusion smoothing with parameter  $t$  ranging from 2 to 36. Fig. 4A shows  
405 the effective filter size in relation to the square root of  $t$ , as estimated from RFT-based  
406 smoothness. We observe that, compared to the application of Gaussian smoothing  
407 operator, the application of differential operators of either geometric Laplacian or  
408 directional derivatives *decreases* the RFT-based smoothness estimation of the effective  
409 filter size.

410 Thus, we equated effective filter sizes before comparing results from different filtering  
411 methods based on a post-hoc estimation of smoothness of fMRI data (Fig 4B). For the  
412 analysis of the spatial scale at which information is encoded on the cortical sheet, we  
413 used a linear range of effective filter sizes of SM from 0 to 46 mm (size 0 for no  
414 smoothing), in 2 mm steps. In Fig. 4B we plotted the effective scales estimated from the  
415 resel numbers of residuals computed by SurfStat toolbox, against the effective filter sizes  
416 of Gaussian smoothing (SM). Corroborating the results of modeling, we observed that the  
417 effective scales of residual were noticeably greater than the effective sizes of the  
418 smoothing filters (Hagler et al. 2006), but smaller than that of the differential operators  
419 being applied.

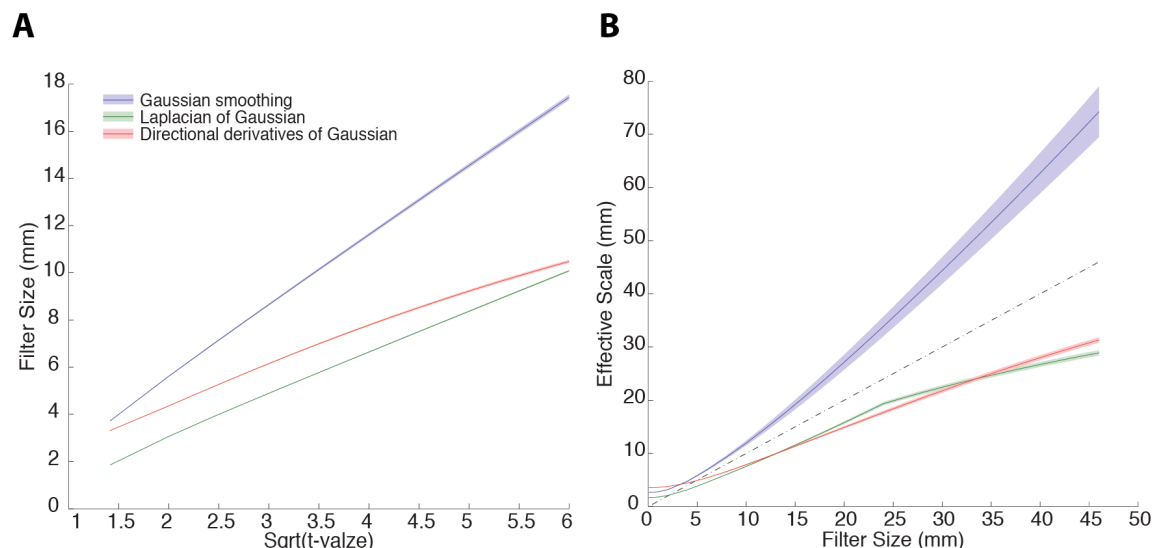

420  
421 **Figure 4:** Effective filter size and effective scale. (a): Effective filter sizes as estimated from RFT  
422 smoothness, plotted against the square root of diffusion parameter  $t$ , for Gaussian smoothing (SM),  
423 Laplacian of Gaussian (LoG) and directional derivatives of Gaussian (dDG). Application of Laplacian of  
424 Gaussian or directional derivatives of Gaussian decreases the RFT-based smoothness estimation of the  
425 effective filter size, requiring correction. b): Effective scales of the residuals from the three different kinds  
426 of filtering of fMRI data on the cortical surface, plotted against the effective size of SM filter. The dash line  
427 shows the equality line of the effective scales and the effective filter sizes. In both plotting, the shaded area  
428 indicates the range of standard error across 12 subjects.

429

### 430 **2.3 The distribution of information on the cortical sheet as resolved by** 431 **different filtering operators**

432 We compared the ability of SM, LoG and dDG to reveal the nature of fMRI activation  
433 patterns underlying information encoding in human visual cortex. For this, we used an  
434 fMRI data set mapping activity in ventral visual cortex while participants viewed 3  
435 different object exemplars in 4 different categories (cars, chairs, planes and animals), i.e.  
436 in total 12 different objects presented to the left and right of fixation. This allowed us to  
437 determine the spatial scale at which information about objects is encoded at two levels of  
438 abstraction: the ordinate category level (e.g. car vs. plane) and the sub-ordinate level (e.g.  
439 one car vs. another car). To determine information encoding, we used multivariate pattern  
440 classification.

441 First, we assessed the spatial distribution of information about objects in a spatially  
442 unbiased analysis. That is, we determined discriminant information between objects on  
443 the cortical sheet detected by multivariate analysis for the three different filtering  
444 methods (SM, loG, dDG) at two levels of abstraction (sub-ordinate and ordinate category  
445 level). Representative results for a single subject at two different spatial scales (equalized  
446 effective scales) are plotted in Fig. 5.

447 For all filtering operations, the regions containing significant discriminant information  
448 about objects include occipito-temporal cortex on the lateral and ventral surface of the  
449 brain, in line with previous studies reporting the location of object representations (Cichy  
450 et al. 2011; Chen et al. 2011). However, we also note three qualitative differences  
451 between filtering operations: overall the results from LoG appear stronger (i.e., yield  
452 higher statistical values and effects of larger extent) than for SM, and stronger for dDG  
453 than for LoG, suggesting that bandpass filters outperform high-pass filters in revealing  
454 discriminant information, and so directional over symmetric filters. Second, while in  
455 general discriminative information seems to be higher for coarser filtering (16mm)  
456 compared to finer (4mm) filtering, the results of the filtering operations differ in the  
457 relative strength depending on whether information pertains to sub-ordinate and ordinate  
458 level. Thus, the filtering methods might be differentially sensitive in detecting differences  
459 in spatial scales at which discriminative information for ordinate vs. sub-ordinate  
460 category distinction is encoded in the brain. Third, results from filtering at 4mm appear  
461 more prominent in posterior portions of the visual brain compared to filtering at 16mm.  
462 This suggests that the spatial scale at which object information is encoded in ventral  
463 visual cortex might increase from posterior to anterior. For quantitative assessment across  
464 subjects, we investigated each of those three observations further in a region of interest  
465 analysis below.

466

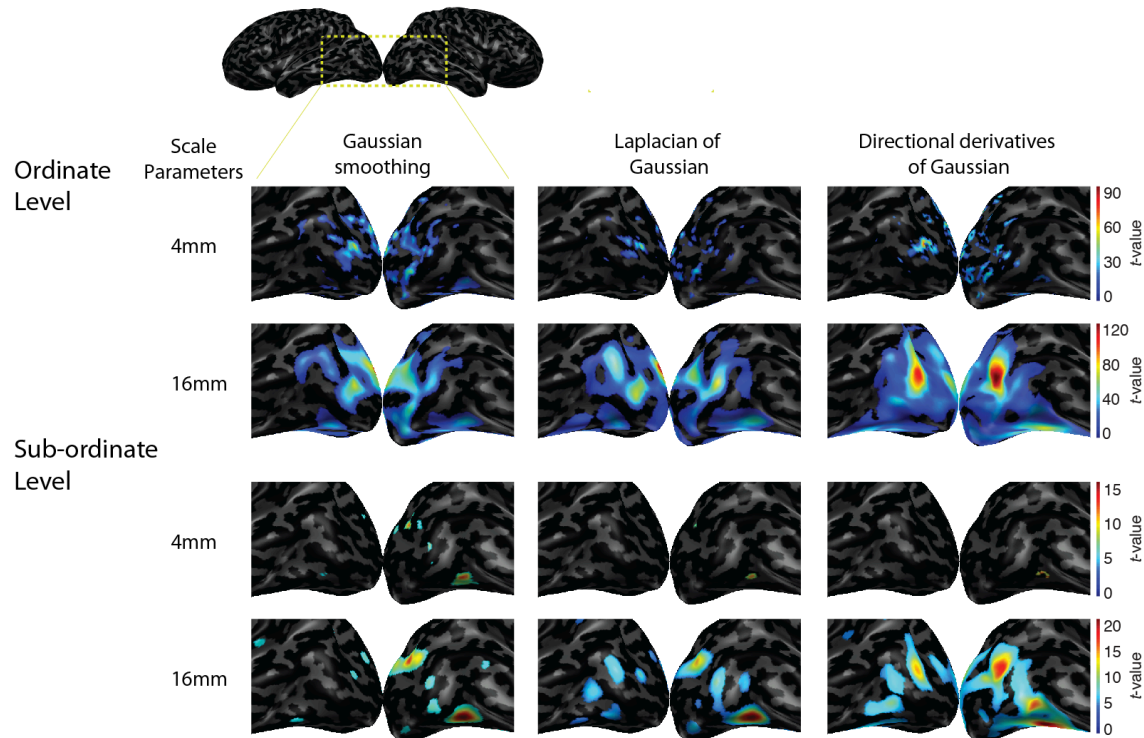

467  
 468 **Figure 5:** Map of discriminant information about ordinate and subordinate categories at two different scales  
 469 (fine: 4mm; coarse: 16mm).  $F$ -statistics (thresholded at  $P < 0.01$ , FWE corrected) from one subject are  
 470 rendered on inflated cortical surface and the lateral-occipital portion of the ventral visual cortex is  
 471 highlighted by the zoomed-ins. For comparison, results from SM (left), LoG (middle) and dDG (right) are  
 472 presented side by side, with colors normalized to the same range for each row. We make three qualitative  
 473 observations: First, SM, LoG and dDG yield increasingly statistically significant results, suggesting the  
 474 bandpass filters and directional filters outperform highpass and symmetric filters in revealing encoded  
 475 information in cortex. Second, while coarser (16mm) filtering yields stronger results than finer (4mm)  
 476 filtering, the relative difference depends on the level of categorization. Third, filtering at 4mm yields more  
 477 posterior results than filtering at 16mm, suggesting that spatial scale at which objects are encoded in ventral  
 478 visual cortex might increase from anterior to posterior.

### 479 2.3.1 Bandpass filtering improves discriminant analysis power of multivariate 480 fMRI analysis

481 We investigated quantitatively whether LoG, dDG and SM differ in the strength of  
 482 discriminant effects across subjects in a region-of-interest (ROI) analysis. We defined  
 483 ROIs anatomically based on Freesurfer parcellation covering the lateral and ventral  
 484 surface of occipito-temporal cortex from the occipital pole to inferior temporal cortex  
 485 (Fig. 6A). To assess possible posterior-to-anterior gradients in information encoding  
 486 along the ventral visual pathway, we split three parcellations (lingual, lateral-occipital  
 487 and fusiform gyrus) into anterior and posterior parts. This resulted in 8 ROIs in total,  
 488 ordered in posterior-to-anterior direction: pericalcarine cortex (PC), anterior and  
 489 posterior lingual cortex (aLN, pLN), anterior and posterior lateral-occipital cortex (aLO  
 490 and pLO), anterior and posterior fusiform cortex (aFF, pFF), and inferior temporal cortex  
 491 (IT).

492 Figure 6 shows the maximal  $F$ -statistics for object discrimination at the ordinate (Fig. 6b)  
 493 and the subordinate (Fig. 6c) level across subjects for each filtering operation for each

494 ROI. Concurrent with the qualitative observation from information maps as reported in  
 495 Fig. 5, we found significantly higher  $F$ -statistics (Wilcoxon signed-rank tests) from  
 496 bandpass filtering (LoG, dDG) over smoothing (SM) in many ROIs, and for directional  
 497 (dDG) over symmetric (Log) filtering (for details see Table 2). Together, these results  
 498 demonstrate the increased power of bandpass filters over simple smoothing to reveal  
 499 discriminant information in spatial activation pattern on the cortical sheet. Please note  
 500 that these peak  $F$ -statistics are maximal over all the scales, implying that bandpass  
 501 filtering as a discriminant information detector can outperform *any* size of smoothing.  
 502 Further, our results highlight the additional value of assessing the direction of gradients in  
 503 activation patterns for increased discrimination performance.

504

505

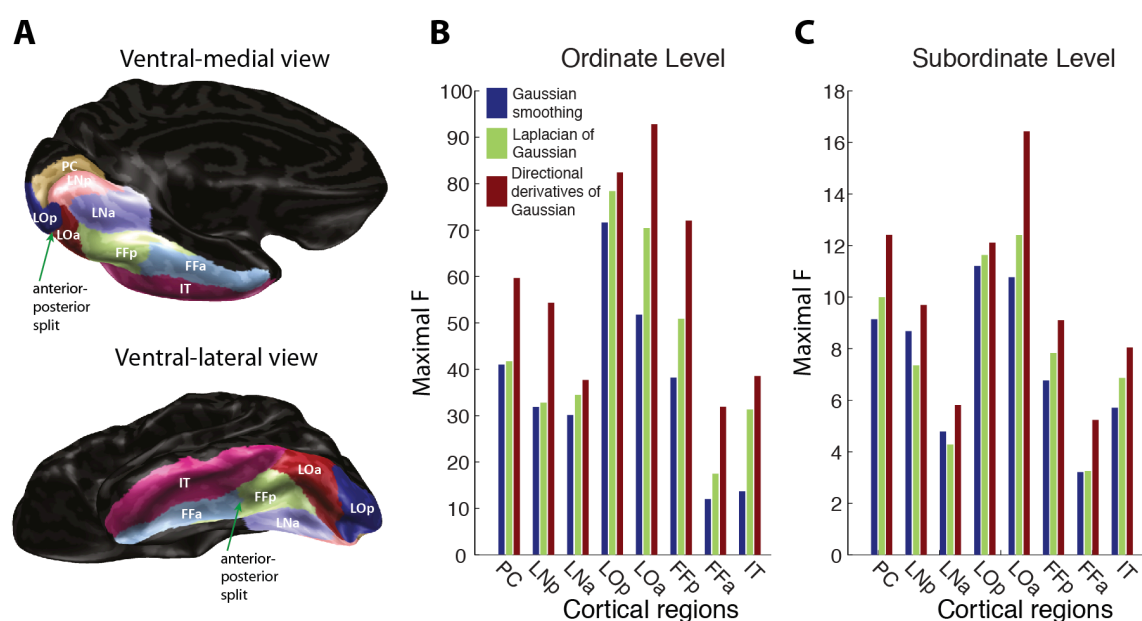

506

507 **Figure 6:** Regional maximal  $F$ -statistics. Maximal  $F$ -statistics across scales are shown here for discriminant  
 508 information on ordinate (left) and subordinate categories. Medians instead of means across subjects  
 509 are plotted, due to the fact that  $F$ -statistics are ratios of Chi-square statistics and not subject to direct  
 510 summation. **Inset:** Anatomical regions for the analysis. Medial (left) and lateral (right) view of the ventral  
 511 visual area anatomically parcellated by Freesurfer. Three regions were further split into anterior and  
 512 posterior part as indicated by the green arrows. In total 8 regions were used in subsequent regional  
 513 analyses: Pericalcarine cortex (PC), anterior and posterior lingual cortex (LNa, LNp), anterior and posterior  
 514 lateral-occipital cortex (LOa, LOp), anterior and posterior fusiform cortex (FFa, FFp) and inferior temporal  
 515 cortex (IT) (B) Group results (mean scales over subjects) from three different filtering methods: Gaussian  
 516 smoothing (SM, left); Laplacian of Gaussian (LoG, middle) and directional derivatives of Gaussian (dDG,  
 517 right). Corroborating the qualitative observation, we found significantly higher  $F$ -statistics from bandpass  
 518 filtering (LoG, dDG) over smoothing (SM) in many ROIs, and for directional (dDG) over symmetric (Log)  
 519 filtering (for details see Table 2).

520

521

| (A) Ordinate level |        |        |        |        |        |        |        |        |        |
|--------------------|--------|--------|--------|--------|--------|--------|--------|--------|--------|
| Comparison         | PC     | LNp    | LNa    | LOp    | LOa    | FFp    | FFa    | IT     | All    |
| dDG > SM           | 0.0024 | 0.0007 | 0.0046 | 0.0549 | 0.0002 | 0.0002 | 0.0002 | 0.0002 | 0.0002 |



|                               |           |            |            |            |            |            |            |           |            |
|-------------------------------|-----------|------------|------------|------------|------------|------------|------------|-----------|------------|
| <b>LoG&gt;SM</b>              | 0.5750    | 0.1902     | 0.0171     | 0.0017     | 0.0007     | 0.0002     | 0.0007     | 0.0002    | 0.0002     |
| <b>dDG&gt;LoG</b>             | 0.0046    | 0.0002     | 0.4548     | 0.6614     | 0.0002     | 0.0002     | 0.0005     | 0.2598    | 0.0881     |
| <b>(A) Sub-ordinate level</b> |           |            |            |            |            |            |            |           |            |
| <b>Comparison</b>             | <b>PC</b> | <b>LNp</b> | <b>LNa</b> | <b>LOp</b> | <b>LOa</b> | <b>FFp</b> | <b>FFa</b> | <b>IT</b> | <b>All</b> |
| <b>dDG &gt; SM</b>            | 0.0386    | 0.0320     | 0.0061     | 0.0061     | 0.0007     | 0.0007     | 0.0024     | 0.0002    | 0.0002     |
| <b>LoG &gt; SM</b>            | 0.2593    | 0.4548     | 0.4250     | 0.0212     | 0.0081     | 0.0757     | 0.3110     | 0.0034    | 0.0034     |
| <b>dDG &gt; LoG</b>           | 0.0171    | 0.0757     | 0.0046     | 0.0647     | 0.0171     | 0.0012     | 0.0002     | 0.0881    | 0.0881     |

**Table 2:** Tests of  $F$ -value differences between different filtering methods ( $P$ -values, Wilcoxon signed-rank tests on maximal  $F$ -statistics). Significant differences ( $P < 0.05$  FDR correction for multiple comparisons; corrected  $P = 0.0171$  in (A) and  $0.0212$  in (B)) are indicated by shading.

522  
523  
524

### 525 **2.3.2 Only directional derivatives of Gaussian uncovers differences in spatial scale** 526 **of cortical information encoding for different levels of abstraction**

527 Qualitative inspection of the information maps suggested that filtering methods might be  
528 differentially sensitive in detecting differences in spatial scales at which discriminative  
529 information for the ordinate vs. sub-ordinate category distinction is encoded in the brain.

530 Here we further investigated this observation quantitatively, assessing the propensity of  
531 high-pass smoothing (SM), Laplacian of Gaussian (LoG) and directional derivatives of  
532 Gaussian (dDG) to reveal those differences. For this we determined the effective scales  
533 for which the  $F$ -value distinguishing conditions at the sub-ordinate or ordinate level was  
534 maximal for each ROI and each filtering method (Fig. 7a for SM, 7b for LoG and 7c for  
535 dDG). To evaluate significance of differences in the spatial scale at which information is  
536 encoded at the sub-ordinate vs. the ordinate level, we conducted a  $3 \times 8$  two-way ANOVA  
537 with factors filtering method (SM, DDG, LoG) and ROI (PC, pLN, aPL, pLO, aLO, pFF,  
538 aFF, IT). We found that the main effect for method was significant ( $F = 7.70$ ,  $P =$   
539  $0.0006$ ), but not the main effect of ROI ( $F = 1.65$ ,  $P = 0.1215$ ), and there was no  
540 interaction ( $F = 1.62$ ,  $p = 0.0749$ ) between the method and the region factors. We thus  
541 collapsed data across ROIs, and tested for differences in effective scale by method in  
542 two-sample  $t$ -tests (FDR corrected for multiple comparisons). We found that only dDG ( $P$   
543  $= 0.001$ ), but neither SM ( $P = 0.99$ ) nor LoG ( $P = 0.40$ ) revealed a significant difference  
544 between categorical levels. Further direct comparison of filtering methods by paired  $t$ -  
545 tests ( $P < 0.05$ , FDR corrected) revealed an order with respect to the differences in  
546 resolving spatial scale differences effective scale differences were significantly larger for  
547 dDG compared to SM ( $P < 0.001$ ) and to LoG ( $P < 0.034$ ) and for LoG compared to SM  
548 ( $P < 0.032$ ).

549 Together, these results show that dDG resolves differences in the spatial scale at which  
550 information is encoded in cortex where other methods fail, demonstrating the improved  
551 resolution of spatial scale of the dDG approach.

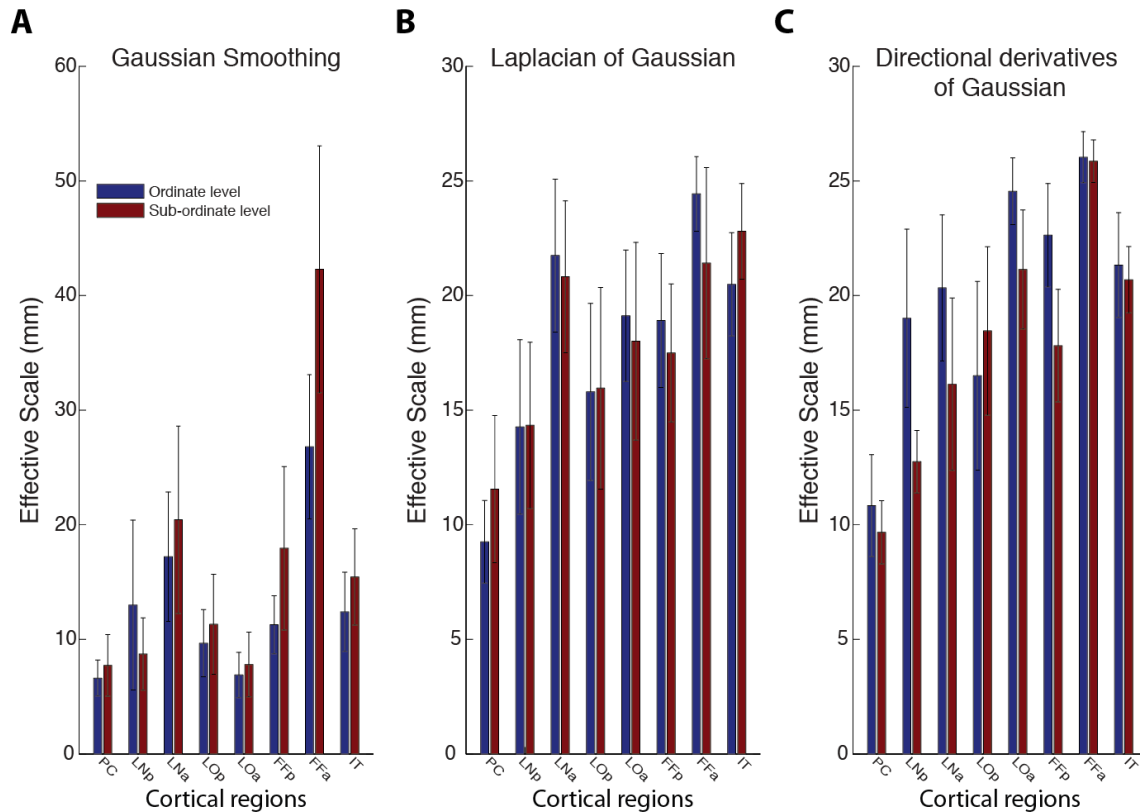

552  
 553 **Figure 7:** Effective scales at which the maximal  $F$ -statistics of ROIs is maximal for sub-ordinate and  
 554 ordinate level distinctions among visual objects for (A) SM, (B) LoG and (C) dDG filtering. Only dDG, but  
 555 neither SM nor LoG revealed a significant difference between categorical levels. Further, the effective scale  
 556 at which information was encoded in ventral visual cortex increased with a posterior to anterior gradient.  
 557 Error bars indicate the standard error across subjects. Regions are ordered to approximately reflect the  
 558 hierarchy in ventral visual cortex from posterior to anterior.  
 559

### 560 2.3.3 The effective scale at which information is encoded in ventral visual cortex 561 increases with a posterior-to-interior gradient

562 Visual inspection of the information map in Fig. 4 had suggested that the spatial scale at  
 563 which information is encoded in ventral visual cortex might increase from posterior to  
 564 anterior. The ROI analysis reinforced this observation (Fig. 7) the spatial scale at which  
 565 classification was maximal at both the sub- and the supra-ordinate level increased along  
 566 the processing path of the ventral visual stream from posterior to anterior

567 We thus quantified this observation by calculating Kendall's tau rank correlation between  
 568 the preferred scales and the ordinate position of the ROIs on the posterior-to-anterior axis  
 569 of ventral visual cortex (ordered as the x-axis in Fig. 7). All filtering methods showed a  
 570 positive correlation for both sub-ordinate and super-ordinate information encoding (Table  
 571 4). This result was ascertained statistically by one sided t-tests, revealing significant  
 572 results for both levels of abstraction and all filtering methods (Table 4, all  $P < 0.05$ , FDR-  
 573 corrected). Together, our results demonstrate a gradual increase in the spatial scale at  
 574 which discriminant information is encoded along the cortical sheet of ventral visual  
 575 cortex.

576

|               | Ordinate level |         |         | Sub-ordinate level |        |         |
|---------------|----------------|---------|---------|--------------------|--------|---------|
|               | SM             | LoG     | dDG     | SM                 | LoG    | dDG     |
| Kendall's tau | 0.2354         | 0.3000  | 0.2872  | 0.2635             | 0.2482 | 0.4215  |
| p-value       | 0.0013         | <0.0001 | <0.0001 | 0.0003             | 0.0007 | <0.0001 |

577 **Table 4:** Kendall rank correlation of scales across regions in ventral visual pathway at the basic and the  
578 sub-ordinate level.

## 579 **3 Discussion**

### 580 **3.1 Summary**

581 Here we present a novel analysis to determine the spatial scale and direction of activation  
582 patterns on the cortical sheet. Using an efficient algorithm for accurately computing  
583 Gaussian smoothing on cortical surfaces and discrete differential operators, we  
584 constructed wavelet-like bandpass filters with directionality and steerability for scale-  
585 specific analysis of cortical activity measurements. Evaluating the algorithm through  
586 modelling, we found increased precision compared to previous approaches. Applying the  
587 analysis to an fMRI data set of visual activation during object vision, we found that our  
588 analysis improved detection of discriminative information between experimental  
589 conditions, and provided novel insight into the cortical representations of objects: the  
590 spatial scale at which objects information is preferentially encoded depends on the level  
591 of categorization, and increase along the ventral visual pathway.

### 592 **3.2 Smoothing and bandpass filtering on the irregular cortical sheet**

#### 593 **3.2.1 All algorithms for Gaussian smoothing are related, but differ in precision** 594 **and complexity**

595 What is the algorithmic nature of the proposed smoothing operator here, and how does it  
596 relate to the approaches compared? Note that all algorithms for Gaussian smoothing on  
597 the surface evaluated here can be formulated as the solution of the diffusion equation (1).  
598 They differ merely the choice of the discrete Laplace operator  $\Delta$  or the respective heat  
599 kernel  $e^{-t\Delta}\delta(x)$ , and the numerical algorithm for implementing its application to the  
600 initial condition or input function  $f_0$ .

601 In particular, iterative averaging (Hagler et al., 2006) is a linear approximation of the  
602 exponential operator applied to the input function, with the choice of normalized graph  
603 Laplacian (for proof see Supplementary Text II). While being the most popular choice for  
604 a smoothing operator, and one to two orders of magnitude *smaller* than the matrix  
605 exponential algorithm in computational complexity, the trade-off is inhomogeneity of  
606 smoothness and geometric deviation from Gaussian kernel. Thus, for detailed analyses of  
607 the spatial scale on irregular meshes a more sophisticated geometric discretization of the  
608 underlying Laplacian operator – as used here – is to be preferred.

#### 609 **3.2.2 Choice of implementation of the exponential of Laplacian**

610 In our approach, we adopt the geometrical Laplacian (4) and matrix exponential  
611 algorithm (Sidje, 1998) to implement the exponential of Laplacian. An alternative would

612 have been to compute the exponential of Laplacian by explicitly solving the general  
613 eigen-decomposition of  $\Delta$  (Seo et al. 2010). However, in practice the eigen-  
614 decomposition would have to be truncated and thus likely suffer from the rippling effects  
615 of spectral truncation and very high computational cost for explicit eigen-decomposition.  
616 Our approach avoids both of these shortcomings, improving both approximation  
617 precision and computational efficiency.

### 618 **3.2.3 The advantage and caveats of implementing bandpass filters by differential** 619 **of smoothing**

620 It is common practice in computer vision to implement isotropic bandpass filters like  
621 LoG by difference of Gaussians (DoG, Marr and Hildreth, 1980). Here, however, we  
622 instead adopted a direct approach to compute bandpass filtering by exploiting the  
623 differential property of convolution for two reasons. First, it is computationally more  
624 efficient when large support of filters is wanted, as it avoids calculating a much (typically  
625 1.6-2x) larger Gaussian smoothing for DoG. Second, and more importantly, it allows  
626 combining first-order partial differential operators with the smoothed function to  
627 construct directional filters of derivatives of Gaussian. Note also that on a domain lacking  
628 a properly defined Fourier transform, such as an irregular mesh, multidimensional  
629 derivative filters cannot be designed directly as in Simoncelli (1994).

630  
631 However, our approach has the caveat that precision relies heavily on the approximation  
632 quality of the discrete differential operator. Particularly, higher order partial differential  
633 operators cannot be constructed straightforwardly by recursive application of first-order  
634 partial differential operators, as differential of gradient vector field would have to deal  
635 with parallel transportation on the surface.

## 636 **3.3 Effective filter size and effective spatial scale need to be assessed** 637 **carefully**

### 638 **3.3.1 The effective scale of results should be distinguished from the effective size of** 639 **filters applied.**

640 Most previous studies analyzing fMRI data at multiple spatial scales relied on filter size  
641 as an indicator of the spatial scale of cortical patterns assessed (Swisher et al., 2010;  
642 Brants et al., 2011; Misaki et al., 2013). That is, they equated the effective scale of results  
643 with the effective size of the filters applied. Contrary to the appealing intuition  
644 underlying this interpretation, we argue that the effective scale of results needs to be  
645 determined independently by estimating the smoothness of residuals based on random  
646 field theory (Hagler et al., 2006).

647  
648 The rationale behind this argument is straightforward: Whereas the effective filter size is  
649 estimated by using spatially independent Gaussian random noise as input functions, in  
650 neuroimaging data intrinsic spatial correlations are omnipresent at multiple scales due to  
651 various physiological and physical sources during the imaging procedure, and contribute  
652 to a noticeable increase of the effective scale of residuals compared to the effective filter  
653 size.

654

655 One particular observation in this regard is that bandpass filters have smaller effective  
656 sizes than smoothing filters of corresponding size. This might appear counter-intuitive at  
657 first sight, as the application of a discrete differential operator to a smoothing kernel  
658 should rather *increase* than *decrease* the support of the actual filter. However, a bandpass  
659 filter from a Gaussian family can be thought as a superimposition of its positive and  
660 negative parts, each of which has a support slightly bigger than half of the smoothing  
661 kernel. When calculated by RFT-based smoothness estimation, the effective filter size of  
662 such filters would approximately be the same as that of the parts (see the almost fixed  
663 ratio between the slopes in Fig. 4).

664  
665 In sum, particular care needs to be taken when estimating the effective scale of results  
666 from neuroimaging data.

### 667 **3.4 The role of bandpass filtering and steerability of the filters**

#### 668 **3.4.1 Steerability is necessary to fully characterize the scale property of** 669 **discriminant information in cortex**

670 Our results indicate that bandpass filters play an important role in characterizing the  
671 spatial scale properties of discriminant information encoded in cortex. The application of  
672 LoG and dDG not only showed an improved performance in discriminant analysis, but  
673 also revealed a systematic *increase* of scale along the ventral visual pathway. Concerning  
674 the further differentiation of LoG and dDG, the difference of characteristic scale between  
675 ordinate and subordinate categorization was only significant when dDG was applied, not  
676 LoG. This suggests that the improved characterization is more likely due to the  
677 steerability of the directional filters, rather than the bandpassing nature of these filters.

678  
679 How is superior ability to detect information to be explained? Looking at steerable  
680 bandpass filters from different perspectives elucidates this issue. From the perspective of  
681 geometry, the optimal linear combination of directional derivative filters, as computed by  
682 the multivariate analysis in SurfStat, indicates a local direction along which the steepest  
683 change is statistically detected. From the perspective of wavelet analysis, steerable  
684 wavelets can be regarded as a special kind of matching pursuits (Bergeaud & Mallat,  
685 1994), which achieve an optimal representation of the underlying discriminant  
686 information pattern in the space spanned by these wavelets. Finally, we may take the  
687 perspective of multivariate pattern analysis (MVPA) while changing the level of  
688 regularization. Spatial filters with specific shape may be considered as MVPA with very  
689 strong regularization. The strongest regularization, as in Gaussian smoothing kernels,  
690 permits only non-negative coefficients. Relaxing the regularization, such as LoG does by  
691 permitting negative coefficients and steerable filters with additional linear weights,  
692 allows better model fits. Interestingly, the very small number of parameters makes this  
693 approach far *less* likely to overfit than other common approaches of MVPA.

## 694 **3.5 Implications for the understanding of the functional organization** 695 **of ventral visual cortex**

### 696 **3.5.1 Information differentiating objects at different levels of categorization is** 697 **preferentially decodable at different scales**

698 Our finding that discriminative information for ordinate categories is decodable  
699 preferentially at a coarser scale than that for sub-ordinate categories concurs with  
700 previous studies, both using fMRI in humans and electrophysiology in monkey (Tanaka  
701 et al., 2003; Op de Beeck et al., 2008; Brants et al., 2011). This further strengthens the  
702 idea that there is an ordered relationship between the topography of high-level ventral  
703 visual cortex and the hierarchy of visual object knowledge.

704 Note that the spatial scales reported here are much coarser than recently reported by joint  
705 analyses of neurophysiological and brain imaging data (Issa et al., 2013) in monkey. We  
706 believe that this discrepancy can be explained by the limited resolution of fMRI  
707 measurement investigated here, and that due to low SNR the analysis is most sensitive  
708 when pooling over a large number of voxels, and thus large spatial scales. Future studies,  
709 using ultra-high field fMRI and higher spatial resolutions will be necessary to resolve this  
710 open issue.

### 711 **3.5.2 Differences in preferential scale at which information is encoded across** 712 **regions suggests different representational schemes**

713 We observed an increase in the preferential scale at which object categorical information  
714 was decodable in regions along the ventral visual stream. This indicates a systematic  
715 change in functional organization at different stages of object processing hierarchy. The  
716 relatively fine scale in early visual cortex (e.g., PC, ~10mm; LNp, ~15mm) suggests a  
717 fine-tuned, retinotopically local encoding of similar object features in small cortical  
718 patches. In contrast, the relatively coarse scale in down-stream regions (e.g.,  
719 LOa, >20mm; FFp, ~20mm) points to global and categorical organizing principles, such  
720 as gradients or topological maps indicating category (Grill-Spector & Weiner, 2014).

721  
722 Our results inform about the nature of visual representations beyond the mere spatial  
723 scale in two ways. First, we observed that bandpass filtering outperforms *any* size of  
724 smoothing in determining the most discriminative information. This speaks against the  
725 idea that discriminant information is encoded in simple activated blobs such as inherent  
726 in the idea of univariate analysis of fMRI data, but is rather represented in inherent  
727 patterning with both positive and negative values, coupled geometrically over the cortical  
728 space. Second, we found that in discriminant analysis steerable filters outperformed  
729 symmetric filters across all regions and scales. This suggests that an intrinsic geometry in  
730 such patterning exists throughout from fine scale in clustering structures in early visual  
731 regions, to large scale topological map-like organization of high-level ventral visual  
732 cortex.

733  
734 Future experiments investigating the detailed nature of representations of visual attributes  
735 other than object identity are necessary to establish the generality of these observations,  
736 and might benefit from the analysis framework proposed here.

737

### 738 **3.6 SUMMARY**

739 Together, our results indicate that the proposed analysis of activation patterns in  
740 scale and direction to be particularly suited to assess and detect scale specific information  
741 encoded by the cortical activity patterns, promising further insight into the topography of  
742 cortical functioning in the human brain.

## 743 **4 Acknowledgements**

744 This work was funded by the Bernstein Computational Neuroscience Program of the  
745 German Federal Ministry of Education and Research BMBF Grant 01GQ0411, the  
746 Excellence Initiative of the German Federal Ministry of Education and Research DFG  
747 Grants GSC86/1-2009, KFO247, HA 5336/1-1 and JA 945/3-1 / SL 185/1-1, and the  
748 Emmy Noether award CI 241-1/1.

## 749 **5 References**

- 750 Bergeaud, F., & Mallat, S. (1994). Matching pursuit of images. In Time-Frequency and  
751 Time-Scale Analysis, 1994. *Proceedings of the IEEE-SP International Symposium* on (pp.  
752 330-333). IEEE.
- 753 Biyikoglu, T., Leydold, J., & Stadler, P. F. (2007). Laplacian eigenvectors of graphs.  
754 *Springer Lecture notes in mathematics*, 1915.
- 755 Brants M, Baeck A, Wagemans J, Op de Beeck HP. (2011). Multiple scales of  
756 organization for object selectivity in ventral visual cortex. *NeuroImage*, 56(3), 1372-  
757 1381.
- 758 Brett, M., Johnsrude, I. S., & Owen, A. M. (2002). The problem of functional localization  
759 in the human brain. *Nature reviews neuroscience*, 3(3), 243-249.
- 760 Chaimow, D., Yacoub, E., Ugurbil, K., & Shmuel, A. (2011). Modeling and analysis of  
761 mechanisms underlying fMRI-based decoding of information conveyed in cortical  
762 columns. *Neuroimage*, 56(2), 627-642.
- 763 Chen, Y., Namburi, P., Elliott, L. T., Heinzle, J., Soon, C. S., Chee, M. W., & Haynes, J.  
764 D. (2011). Cortical surface-based searchlight decoding. *Neuroimage*, 56(2), 582-592.
- 765 Chung, M. K., Robbins, S. M., Dalton, K. M., Davidson, R. J., Alexander, A. L., &  
766 Evans, A. C. (2005). Cortical thickness analysis in autism with heat kernel smoothing.  
767 *NeuroImage*, 25(4), 1256-1265.
- 768 Cichy, R. M., Chen, Y., & Haynes, J. D. (2011). Encoding the identity and location of  
769 objects in human LOC. *Neuroimage*, 54(3), 2297-2307.

- 770 Dale, A. M., Fischl, B., & Sereno, M. I. (1999). Cortical surface-based analysis: I.  
771 Segmentation and surface reconstruction. *Neuroimage*, 9(2), 179-194.
- 772 Daubechies, I. (1990). The wavelet transform, time-frequency localization and signal  
773 analysis. *Information Theory, IEEE Transactions on*, 36(5), 961-1005.
- 774 Fischl, B., van der Kouwe, A., Destrieux, C., Halgren, E., Ségonne, F., Salat, D. H., Busa,  
775 E., Seidman, L. J., Goldstein, J., Kennedy, D., Caviness, V., Makris, N., Rosen, B. &  
776 Dale, A. M. (2004). Automatically parcellating the human cerebral cortex. *Cerebral*  
777 *cortex*, 14(1), 11-22.
- 778 Fischl, B., Sereno, M. I., & Dale, A. M. (1999). Cortical surface-based analysis: II:  
779 Inflation, flattening, and a surface-based coordinate system. *Neuroimage*, 9(2), 195-207.
- 780 Freeman, W. T. and Adelson, E. H. (1991). The design and use of steerable filters. *IEEE*  
781 *Transactions on Pattern Analysis and Machine Intelligence*, 13(9):891–906.
- 782 Freeman, J., Brouwer, G. J., Heeger, D. J., & Merriam, E. P. (2011). Orientation decoding  
783 depends on maps, not columns. *The Journal of Neuroscience*, 31(13), 4792-4804.
- 784 Freeman, J., Heeger, D. J., & Merriam, E. P. (2013). Coarse-scale biases for spirals and  
785 orientation in human visual cortex. *The Journal of Neuroscience*, 33(50), 19695-19703.
- 786 Goesaert, E., & de Beeck, H. P. O. (2010). Continuous mapping of the cortical object  
787 vision pathway using traveling waves in object space. *Neuroimage*, 49(4), 3248-3256.
- 788 Grill-Spector, K., & Weiner, K. S. (2014). The functional architecture of the ventral  
789 temporal cortex and its role in categorization. *Nature Reviews Neuroscience*, 15(8), 536-  
790 548.
- 791 Grinvald, A., Lieke, E., Frostig, R. D., Gilbert, C. D., & Wiesel, T. N. (1986). Functional  
792 architecture of cortex revealed by optical imaging of intrinsic signals. *Nature*, 324(6095),  
793 361-364.
- 794 Haynes, J. D., & Rees, G. (2005). Predicting the orientation of invisible stimuli from  
795 activity in human primary visual cortex. *Nature neuroscience*, 8(5), 686-691.
- 796 Hagler, D. J., Saygin, A. P., & Sereno, M. I. (2006). Smoothing and cluster thresholding  
797 for cortical surface-based group analysis of fMRI data. *Neuroimage*, 33(4), 1093-1103.
- 798 Haxby, J. V., Gobbini, M. I., Furey, M. L., Ishai, A., Schouten, J. L., & Pietrini, P. (2001).  
799 Distributed and overlapping representations of faces and objects in ventral temporal  
800 cortex. *Science*, 293(5539), 2425-2430.
- 801 Hubel, D. H., & Wiesel, T. N. (1963). Shape and arrangement of columns in cat's striate  
802 cortex. *The Journal of physiology*, 165(3), 559-568.
- 803 Issa, E. B., Papanastassiou, A. M., & DiCarlo, J. J. (2013). Large-scale, high-resolution



- 804 neurophysiological maps underlying fMRI of macaque temporal lobe. *The Journal of*  
805 *Neuroscience*, 33(38), 15207-15219.
- 806 Kamitani, Y., & Tong, F. (2005). Decoding the visual and subjective contents of the  
807 human brain. *Nature neuroscience*, 8(5), 679-685.
- 808 Koenderink, J. J. (1984). The structure of images. *Biological cybernetics*, 50(5), 363-370.
- 809 Kanwisher, N., & Yovel, G. (2006). The fusiform face area: a cortical region specialized  
810 for the perception of faces. *Philosophical Transactions of the Royal Society B: Biological*  
811 *Sciences*, 361(1476), 2109-2128.
- 812 Logothetis, N. K., & Wandell, B. A. (2004). Interpreting the BOLD signal. *Annu. Rev.*  
813 *Physiol.*, 66, 735-769.
- 814 Maldonado, P. E., Gödecke, I., Gray, C. M., & Bonhoeffer, T. (1997). Orientation  
815 selectivity in pinwheel centers in cat striate cortex. *Science*, 276(5318), 1551-1555.
- 816 Mallat, S. (2008). A wavelet tour of signal processing: the sparse way. Academic press.
- 817 Marr, D., & Hildreth, E. (1980). Theory of edge detection. Proceedings of the Royal  
818 Society of London. Series B. Biological Sciences, 207(1167), 187-217.
- 819 Meyer, M., Desbrun, M., Schröder, P., & Barr, A. H. (2003). Discrete differential-  
820 geometry operators for triangulated 2-manifolds. *Visualization and mathematics III* 35-  
821 57. Springer.
- 822 Misaki, M., Luh, W. M., & Bandettini, P. A. (2013). The effect of spatial smoothing on  
823 fMRI decoding of columnar-level organization with linear support vector machine.  
824 *Journal of neuroscience methods*, 212(2), 355-361.
- 825 Op de Beeck, H. P., DiCarlo, J. J., Goense, J. B., Grill-Spector, K., Papanastassiou, A.,  
826 Tanifuji, M., & Tsao, D. Y. (2008). Fine-scale spatial organization of face and object  
827 selectivity in the temporal lobe: do functional magnetic resonance imaging, optical  
828 imaging, and electrophysiology agree?. *The Journal of Neuroscience*, 28(46), 11796-  
829 11801.
- 830 Portilla, J., & Simoncelli, E. P. (2000). A parametric texture model based on joint  
831 statistics of complex wavelet coefficients. *International Journal of Computer Vision*,  
832 40(1), 49-70.
- 833 Ramírez, F. M., Cichy, R. M., Allefeld, C., & Haynes, J. D. (2014). The Neural Code for  
834 Face Orientation in the Human Fusiform Face Area. *The Journal of Neuroscience*,  
835 34(36), 12155-12167.
- 836 Reuter, M., Biasotti, S., Giorgi, D., Patanè, G., & Spagnuolo, M. (2009). Discrete  
837 Laplace–Beltrami operators for shape analysis and segmentation. *Computers & Graphics*,  
838 33(3), 381-390.

- 839 Rust, N. C., & DiCarlo, J. J. (2010). Selectivity and tolerance (“invariance”) both  
840 increase as visual information propagates from cortical area V4 to IT. *The Journal of*  
841 *Neuroscience*, 30(39), 12978-12995.
- 842 Seo, S., Chung, M. K., & Vorperian, H. K. (2010). Heat kernel smoothing using Laplace-  
843 Beltrami eigenfunctions. In *Medical Image Computing and Computer-Assisted*  
844 *Intervention–MICCAI 2010* (pp. 505-512). Springer Berlin Heidelberg.
- 845 Shmuel, A., Chaimow, D., Raddatz, G., Ugurbil, K., & Yacoub, E. (2010). Mechanisms  
846 underlying decoding at 7 T: ocular dominance columns, broad structures, and  
847 macroscopic blood vessels in V1 convey information on the stimulated eye. *Neuroimage*,  
848 49(3), 1957-1964.
- 849 Simoncelli, E. P., & Freeman, W. T. (1995). The steerable pyramid: A flexible  
850 architecture for multi-scale derivative computation. *International Conference on Image*  
851 *Processing*, (Vol. 3, 3444-3444). IEEE Computer Society.
- 852 Sidje, R. B. (1998). Expokit: a software package for computing matrix exponentials.  
853 *ACM Transactions on Mathematical Software (TOMS)*, 24(1), 130-156.
- 854 Swisher, J. D., Gatenby, J. C., Gore, J. C., Wolfe, B. A., Moon, C. H., Kim, S. G., &  
855 Tong, F. (2010). Multiscale pattern analysis of orientation-selective activity in the  
856 primary visual cortex. *The Journal of Neuroscience*, 30(1), 325-330.
- 857 Unser, M., Chenouard, N., & Van De Ville, D. (2011). Steerable Pyramids and Tight  
858 Wavelet Frames. *IEEE Transactions on Image Processing*, 20(10), 2705-2721.
- 859 Van Essen, D. C., Drury, H. A., Joshi, S., & Miller, M. I. (1998). Functional and structural  
860 mapping of human cerebral cortex: solutions are in the surfaces. *Proceedings of the*  
861 *National Academy of Sciences*, 95(3), 788-795.
- 862 Van Essen, D. C., Lewis, J. W., Drury, H. A., Hadjikhani, N., Tootell, R. B., Bakircioglu,  
863 M., & Miller, M. I. (2001). Mapping visual cortex in monkeys and humans using surface-  
864 based atlases. *Vision research*, 41(10), 1359-1378.
- 865 Van Essen, David C., and Donna L. Dierker. "Surface-based and probabilistic atlases of  
866 primate cerebral cortex." *Neuron* 56.2 (2007): 209-225.
- 867 Wang, B., Hikino, Y., Imajyo, S., Ohno, S., Kanazawa, S., & Wu, J. (2012). Effect of  
868 spatial smoothing on regions of interested analysis basing on general linear model.  
869 *International Conference on Mechatronics and Automation (ICMA)* (1399-1404). IEEE.
- 870 Worsley, K. J., Jonathan E. Taylor, F. Carbonell, M. K. Chung, E. Duerden, B. Bernhardt,  
871 O. Lyttelton, M. Boucher, and A. C. Evans. (2009) SurfStat: A Matlab toolbox for the  
872 statistical analysis of univariate and multivariate surface and volumetric data using linear  
873 mixed effects models and random field theory. *Neuroimage* (47). (software package  
874 available at [www.math.mcgill.ca/keith/surfstat](http://www.math.mcgill.ca/keith/surfstat))
